# Supplementary material for: Fabrication of metallic charge transfer channel between photoanode Ti/Fe2O3 and cocatalyst CoOx: an effective strategy for promoting photoelectrochemical water oxidation
Source: Royal Society of Chemistry journal article supplement (doi:10.1039/c6ta05337h), 2016-01-01
Supplement: c6ta05337h1.pdf [file c6ta05337h1.pdf]

**Fabrication of Metallic Charge Transfer Channel between  
Photoanode Ti/Fe<sub>2</sub>O<sub>3</sub> and Cocatalyst CoO<sub>x</sub>: An Effective Strategy of  
Promoting Photoelectrochemical Water Oxidation**

Shuo Li,<sup>a</sup> Qidong Zhao,<sup>b</sup> Dedong Meng, Dejun Wang<sup>a,c</sup> and Tengfeng Xie<sup>a,\*</sup>

a. College of Chemistry, Jilin University, Changchun 130012, P.R. (China).

b. School of Petroleum and Chemical Engineering, Dalian University of Technology, Panjin 124221, P.R. (China).

c. Department of Chemistry, Tsinghua University, Beijing 100084, P.R. (China).

## ADDITIONAL EXPERIMENTAL SECTION

### 1. Additional Preparation of Samples

**Preparation of various amount of metal Co modified Ti/Fe<sub>2</sub>O<sub>3</sub> photoanodes:** 1 mg, 2 mg, 4 mg and 8 mg cobalt (III) 2,4-pentanedionate was dispersed in 30 ml N,N-Dimethylformamide, respectively. The obtained solution was then transferred into a teflon-lined autoclave. A Ti/Fe<sub>2</sub>O<sub>3</sub> film was placed in the teflon-liner and maintained at 200 °C for 10 h. The film was washed with absolute ethanol and then dried at 80 °C under N<sub>2</sub> flow. The obtained electrodes were denoted as Co1-Ti/Fe<sub>2</sub>O<sub>3</sub>, Co2-Ti/Fe<sub>2</sub>O<sub>3</sub>, Co4-Ti/Fe<sub>2</sub>O<sub>3</sub>, Co8-Ti/Fe<sub>2</sub>O<sub>3</sub>. The obtained films were annealed at 250 °C in air for 1 h to obtain core-shell Co/CoO<sub>x</sub> modified Ti/Fe<sub>2</sub>O<sub>3</sub> electrodes (respectively denoted as Co1-250-Ti/Fe<sub>2</sub>O<sub>3</sub>, Co2-250-Ti/Fe<sub>2</sub>O<sub>3</sub>, Co4-250-Ti/Fe<sub>2</sub>O<sub>3</sub>, Co8-250-Ti/Fe<sub>2</sub>O<sub>3</sub>), and annealed at 550 °C in air for 2 h to obtain CoO<sub>x</sub> modified Ti/Fe<sub>2</sub>O<sub>3</sub> electrodes (respectively denoted as Co1-550-Ti/Fe<sub>2</sub>O<sub>3</sub>, Co2-550-Ti/Fe<sub>2</sub>O<sub>3</sub>, Co4-550-Ti/Fe<sub>2</sub>O<sub>3</sub>, Co8-550-Ti/Fe<sub>2</sub>O<sub>3</sub>).

**Note:** If not specially indicated, the Co-Ti/Fe<sub>2</sub>O<sub>3</sub>, Co250-Ti/Fe<sub>2</sub>O<sub>3</sub> and Co550-Ti/Fe<sub>2</sub>O<sub>3</sub> represent Co2-Ti/Fe<sub>2</sub>O<sub>3</sub>, Co2-250-Ti/Fe<sub>2</sub>O<sub>3</sub> and Co2-550-Ti/Fe<sub>2</sub>O<sub>3</sub> in the manuscript and supporting information, respectively.

**Synthesis of free metal Co, core-shell Co/CoO<sub>x</sub> (Co250) and CoO<sub>x</sub> (Co550) powder:** The procedure is the same as that of preparing photoanodes. The only difference is that no Ti/Fe<sub>2</sub>O<sub>3</sub> films were added during the synthesis.

### 2. Additional Characterization

Laser excited photocurrent transient measurements were carried out on home-made two-electrode system as schematically shown in Figure S1.

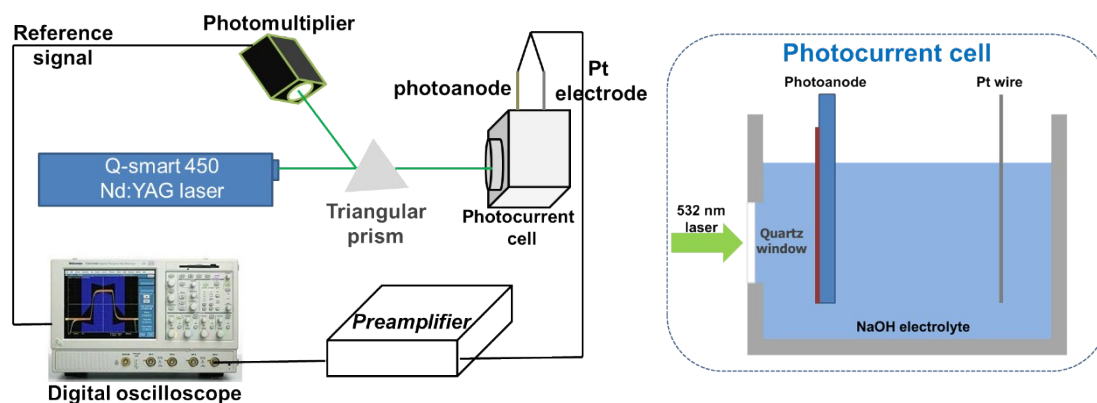

Figure S1. Scheme of the laser excited photocurrent transient measurement setup.

The crystal structure of the as-prepared samples was characterized by X-ray diffraction (XRD) using a Rigaku D/Max-2550 X-ray diffractometer with Cu-K $\alpha$  radiation ( $\lambda = 1.5418 \text{ \AA}$ ) at 50 kV and 200 mA in the  $2\theta$  range of  $20\text{--}80^\circ$  with a scanning rate of  $5^\circ \text{ min}^{-1}$ . The optical absorption spectra of the samples were measured using a UV-vis-NIR spectrophotometer (Shimadzu UV-3600) over the range of 300–800 nm.

## ADDITIONAL FIGURES AND DISCUSSION

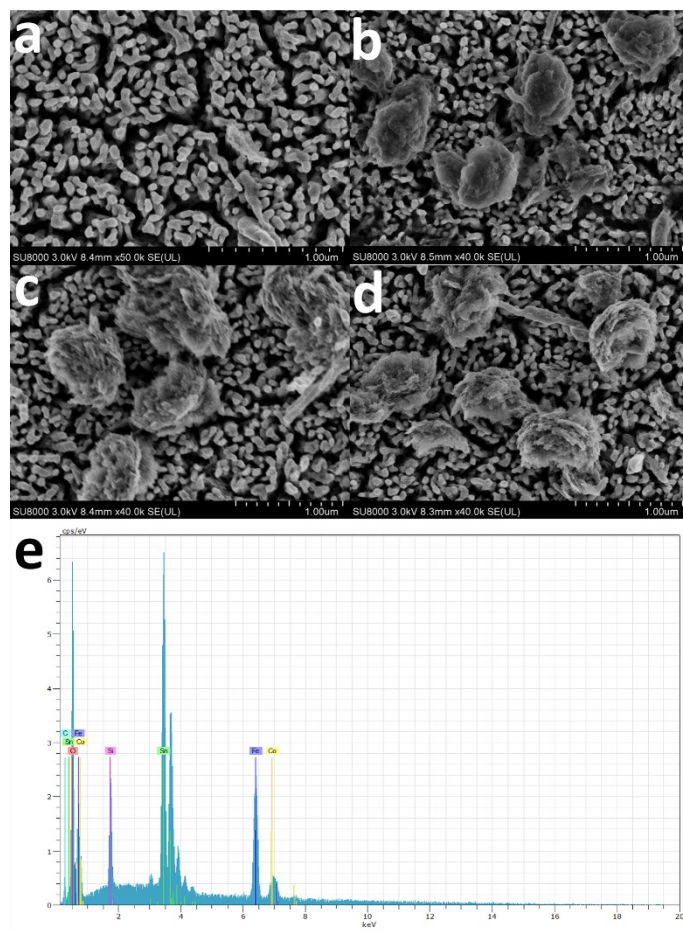

Figure S2. Top-view SEM images of Ti/Fe<sub>2</sub>O<sub>3</sub> (a), Co8-Ti/Fe<sub>2</sub>O<sub>3</sub> (b), Co8-250-Ti/Fe<sub>2</sub>O<sub>3</sub> (c), Co8-550-Ti/Fe<sub>2</sub>O<sub>3</sub> (d) and EDX spectrum of Co8-Ti/Fe<sub>2</sub>O<sub>3</sub> sample.

SEM in the Electronic Supplementary Information was carried out on a field-emission scanning electron microscope (SEM, SU8020; HITACHI)

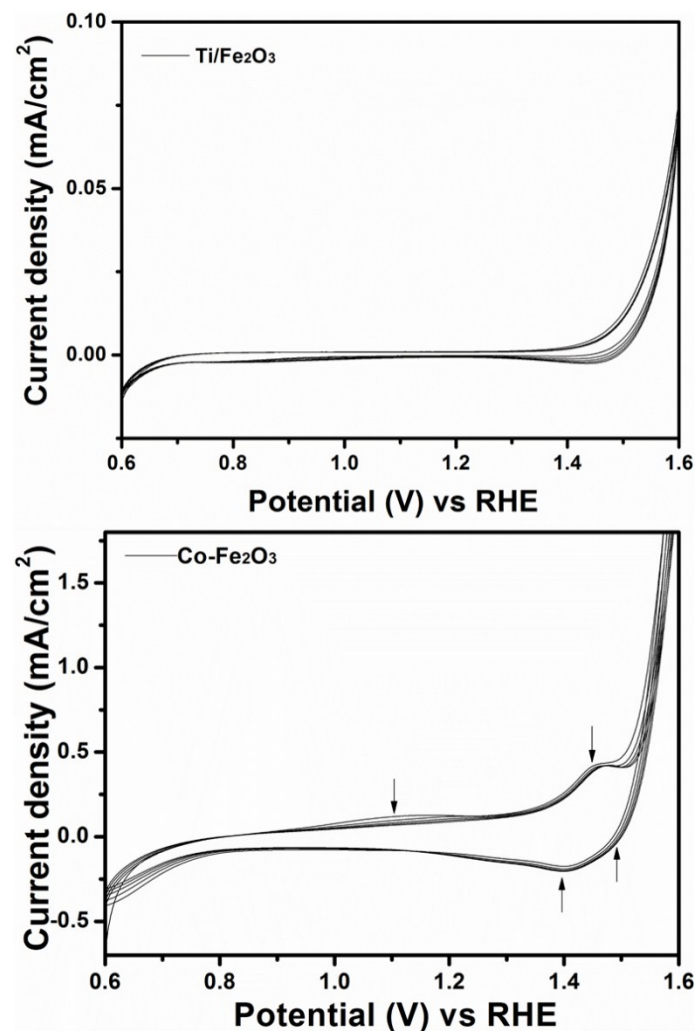

Figure S3. Cyclic voltammograms of Ti/Fe<sub>2</sub>O<sub>3</sub> and Co-Ti/Fe<sub>2</sub>O<sub>3</sub> electrodes.

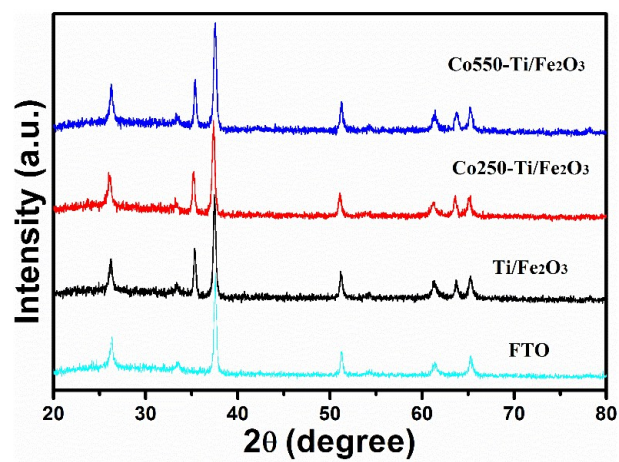

Figure S4. XRD patterns of FTO, Ti/Fe<sub>2</sub>O<sub>3</sub>, Co250-Ti/Fe<sub>2</sub>O<sub>3</sub> and Co550-Ti/Fe<sub>2</sub>O<sub>3</sub> electrodes.

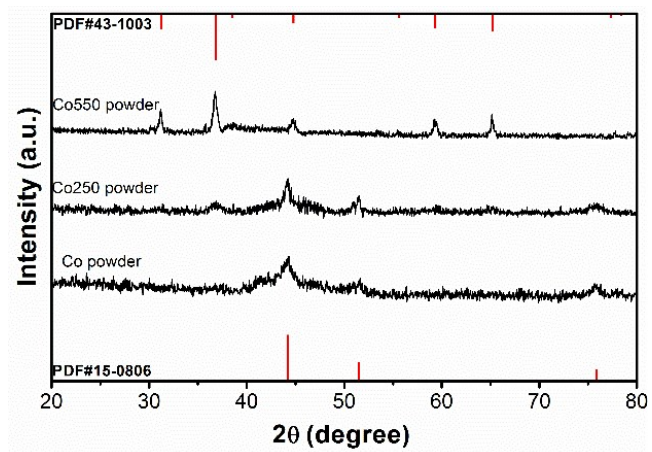

Figure S5. XRD patterns of Co, Co250 and Co550 powder.

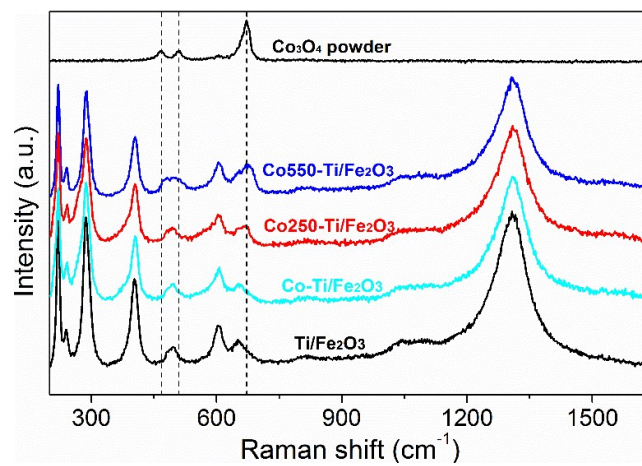

Figure S6. Raman spectra of  $\text{Ti/Fe}_2\text{O}_3$ ,  $\text{Co-Ti/Fe}_2\text{O}_3$ ,  $\text{Co250-Ti/Fe}_2\text{O}_3$  and  $\text{Co550-Ti/Fe}_2\text{O}_3$  electrodes.

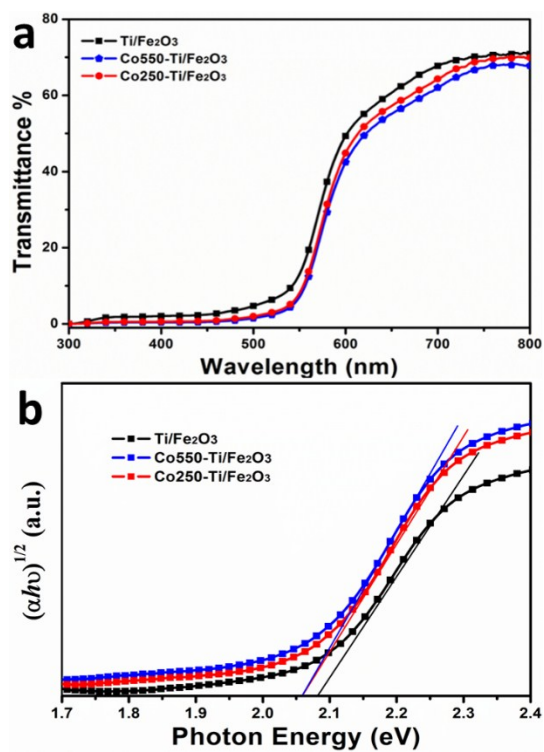

Figure S7. UV-vis transmittance spectra (a) and the corresponding Tauc's plots (b) of Ti/Fe<sub>2</sub>O<sub>3</sub>, Co250- Ti/Fe<sub>2</sub>O<sub>3</sub> and Co550- Ti/Fe<sub>2</sub>O<sub>3</sub> electrodes.



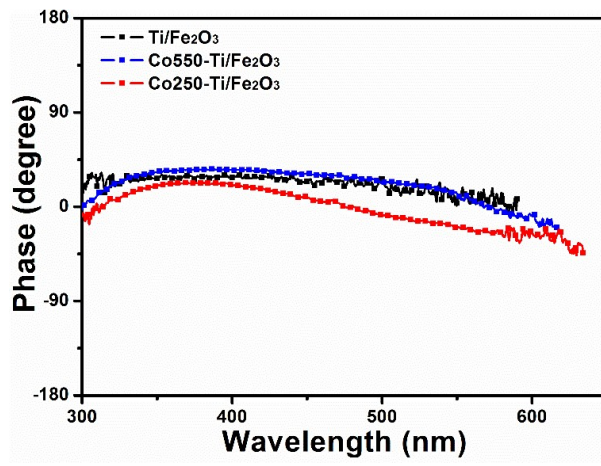

Figure S8. SPV phase spectra of Ti/Fe<sub>2</sub>O<sub>3</sub>, Co250-Ti/Fe<sub>2</sub>O<sub>3</sub> and Co550-Ti/Fe<sub>2</sub>O<sub>3</sub> samples.

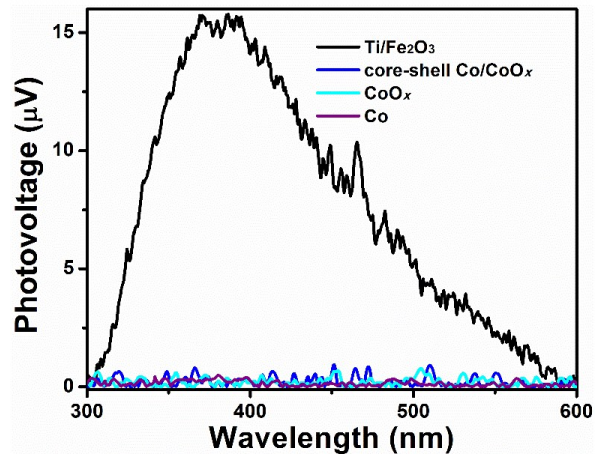

Figure S9. SPV spectra of Ti/Fe<sub>2</sub>O<sub>3</sub> film, metal Co, core-shell Co/CoO<sub>x</sub> and CoO<sub>x</sub> powder collected by lock-in amplifier.

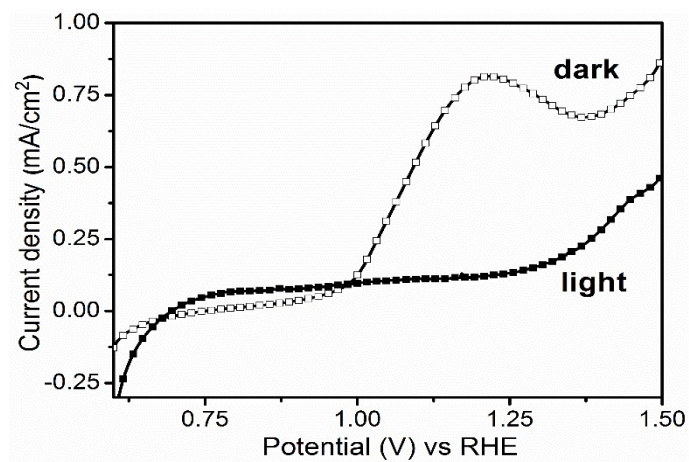

Figure S10. Photocurrent and dark current densities of Co-Ti/Fe<sub>2</sub>O<sub>3</sub> electrode under 100 mW/cm<sup>2</sup> visible light illumination with scanning rate: 5 mV s<sup>-1</sup>.

It is obvious that the photocurrent intensity is even lower than that of dark current. As the metal Co could be oxidized more easily than water, the merely Co modified electrode could not be favorably applied in the PEC water oxidation.

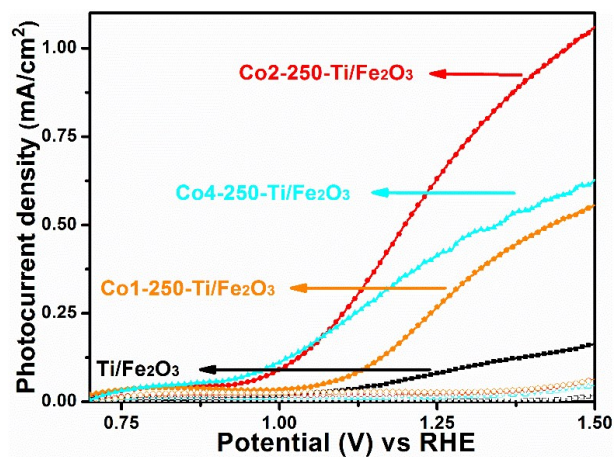

Figure S11. Photocurrent and dark current densities of Ti/Fe<sub>2</sub>O<sub>3</sub>, Co1-250-Ti/Fe<sub>2</sub>O<sub>3</sub>, Co2-250-Ti/Fe<sub>2</sub>O<sub>3</sub>, Co4-250-Ti/Fe<sub>2</sub>O<sub>3</sub> electrodes under 100 mW/cm<sup>2</sup> visible light illumination with scanning rate: 5 mV s<sup>-1</sup>.

The Co2-250-Ti/Fe<sub>2</sub>O<sub>3</sub> electrode exhibited the best PEC water oxidation performance. Therefore, we select this electrode as the object to discuss in the main manuscript.

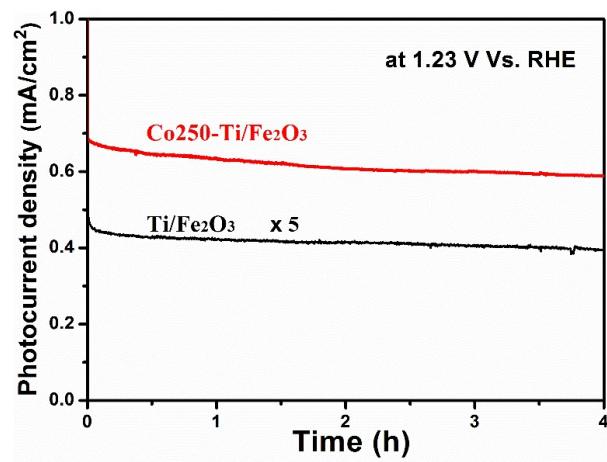

Figure S12. Photocurrent stability curves of Ti/Fe<sub>2</sub>O<sub>3</sub> and Co250- Ti/Fe<sub>2</sub>O<sub>3</sub> electrodes.

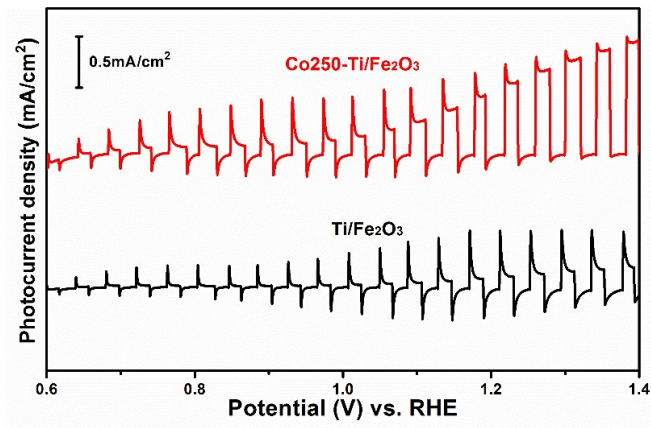

Figure S13. Chopped light J-V curves under 100 mW/cm<sup>2</sup> visible light illumination with scanning rate: 5 mV s<sup>-1</sup>.

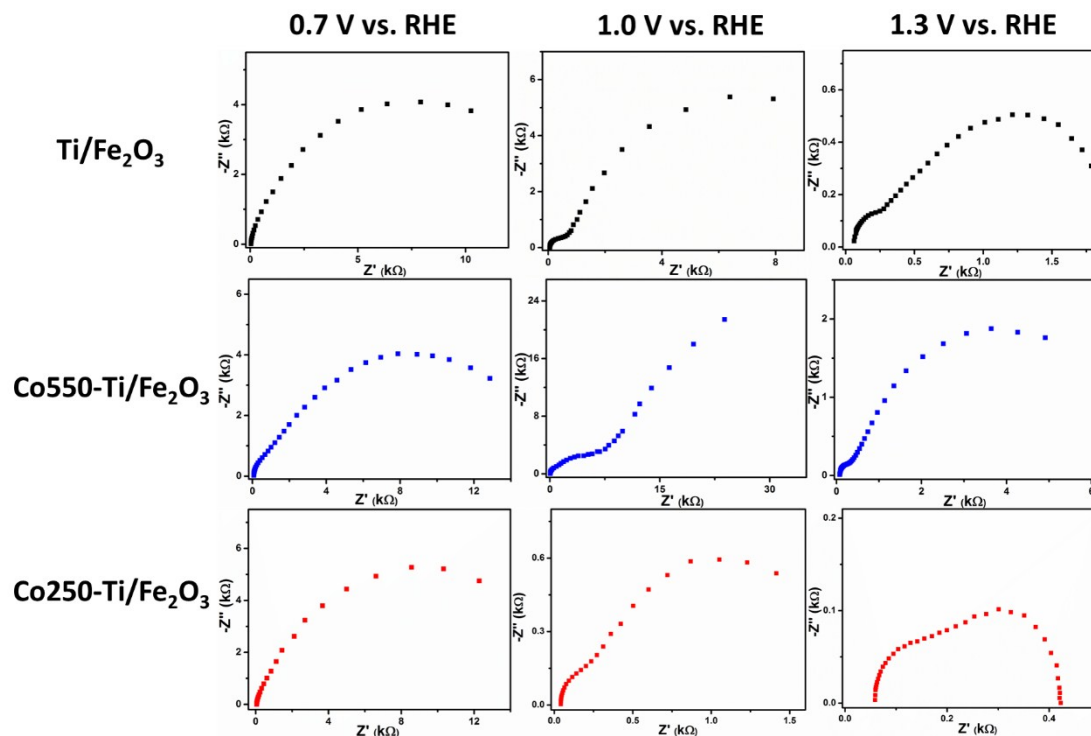

Figure S14. Nyquist plots of Ti/Fe<sub>2</sub>O<sub>3</sub>, Co250-Ti/Fe<sub>2</sub>O<sub>3</sub> and Co550-Ti/Fe<sub>2</sub>O<sub>3</sub> electrodes at various potential under 100 mW/cm<sup>2</sup> visible light illumination.

**At 0.7 V vs. RHE:** the semicircles diameter of the three electrodes are quite similar and all of the three electrodes exhibit strong transfer resistance of photogenerated holes. Actually, at this potential, all of the three electrodes could not drive PEC water oxidation reaction. Therefore, large impedance was with them.

**At 1.0 V vs. RHE:** the semicircles diameter of Ti/Fe<sub>2</sub>O<sub>3</sub> becomes a little smaller, which is well consistent with the onset potential of Ti/Fe<sub>2</sub>O<sub>3</sub> electrode. At this potential, the PEC water oxidation reaction of Ti/Fe<sub>2</sub>O<sub>3</sub> electrode is just to start.

As a contrast, the semicircles diameter of Co550-Ti/Fe<sub>2</sub>O<sub>3</sub> becomes quit bigger. This phenomenon is because more photogenerated holes accumulated at the interface between Ti/Fe<sub>2</sub>O<sub>3</sub> and CoO<sub>x</sub> compared with 0.7 V vs. RHE, and photogenerated holes also could not transfer to the surface to drive PEC water oxidation reaction. Therefore, we observe much larger impedance.

For comparison, the semicircles diameter of Co250-Ti/Fe<sub>2</sub>O<sub>3</sub> becomes quit smaller. At this potential, photogenerated holes could transfer to the surface of CoO<sub>x</sub> cocatalyst across the metallic charge transfer channel to drive PEC water oxidation reaction. Therefore, we observe much smaller impedance.

**At 1.3 V vs. RHE:** the transfer resistance of Co550-Ti/Fe<sub>2</sub>O<sub>3</sub> is still quite strong. While, the transfer resistance of Co250-Ti/Fe<sub>2</sub>O<sub>3</sub> becomes further weakened.

These various changes of EIS curves of the three electrodes at different potentials indicate metal Co plays an important role in charge transfer and PEC reaction.
